# Supplementary material for: Confronting ‘chaos’: a qualitative study assessing public health officials’ perceptions of the factors affecting Tanzania’s COVID-19 vaccine rollout
Source: HighWire-hosted journal article supplement (doi:10.1136/bmjopen-2022-065081), 2023-01-01
Supplement: bmjopen-2022-065081supp001_data_supplement.pdf [file bmjopen-2022-065081supp001_data_supplement.pdf]

## Interview Guide – Donors/INGOs/NGOs/CBOs

Hello. I work for Mzumbe University under the direction of Professor Henry Mollel. We are collecting data to examine the changes in COVID-19 response in Tanzania since President Hassan took office. The purpose of these data is to contribute information on Tanzania to a research article on global policy responses to the pandemic. We are conducting original interviews with 10 representatives of INGOs/NGOs/CBOs and 20-30 purposively selected local government officials from diverse geographic areas. During our interviews, we will ask questions about what activities you are engaged in to contain COVID-19, how the policy environment for COVID-19 containment has changed under President Hassan, and your perceptions on how communities are reacting to COVID-19 since President Hassan took office.

We are not affiliated with the government, and will not share your responses with government officials or police. These interviews will be confidential. In our report on the data, we will not include names or other information that could potentially identify you. We will not reveal the geographic location or position of the person when discussing individual responses to our questions.

This interview is completely voluntary, meaning you can stop the interview at any time. You can also refuse to answer any question.

Do you have any questions about the research?

I would like to audio record the interview so that I may capture all of the details of what you say. Do you give consent for me to audio record?

Habari.Nafanya Kazi na Chuo Kikuu Mzumbe chini ya uongozi wa Prof.Mollel.Tunakusanya taarifa kuangalia mabadiliko ya kukabiliana na UVIKO- 19 tangu rais Hassani achukue madaraka.Lengo la hizi taarifa ni kuboresha taarifa kama nchi kwenye tafiti makala ya Sera za kidunia za kukabiliana na janga hili,Tunafanya mahojiano na wawakilishi kumi (10) kutoka taasisi za Kimataifa zisizo za serikali,taasisi zisizo za kiserikali na taasisi za kijamii, na washiriki wengine 20-30 watakaochaguliwa kutoka maeneo mbalimbali ambao ni maafisa wa Serikali za Mitaa

1. Please describe for me what your organization does.
  - a. What is your organization's mission?
  - b. What is your role in the organization?
  - c. What was your training? (Highest degree completed/certification completed and in what field)

Tafadhali eleza taasisi yako inajishughulisha na nini?

- a. Nini dhamira ya taasisi yako?

- b. Nini jukumu lako kwenye taasisi
  - c. Umepata mafunzo gani?
2. **What activities are you/your office engaged in related to combating the spread of coronavirus? Are you engaging in activities related to the COVID-19 vaccine? (e.g., demand creation, distribution, overcoming vaccine hesitancy, etc.)**

Ni shughuli gani wewe au ofisi yako inajishughulisha nazo katika kuzuia kusambaa kwa virusi vya UVIKO-19

3. **Have your activities of responding to COVID 19 changed since President Hassan took office? How so?**

Je shughuli zenu za kupambana na UVIKO-19 zimebadilika tangu Raisi Samia Suluhu Hassan aingie madarakani? Kwa namna gani?

4. **Overall, how would you characterize Tanzania's response to COVID-19 under President Hassan? Is it significantly different from President Magufuli's?**

Kwa ujumla, unaonaje namna Tanzania inavyopambana na UVIKO-19 chini ya Raisi Samia Suluhu Hassan? Kuna tofauti kubwa ukilinganisha na wakati wa Raisi Magufuli?

- a. **What do you think influences President Hassan's decision-making? How are these influences different from under President Magufuli**

5. **How has access to information related to COVID-19 changed since President Hassan took office?**

Ni kwa jinsi gani upatikanaji wa taarifa za UVIKO-19 umebadilika tangu Raisi Samia Suluhu Hassan kuingia madarakani?

- a. **What information is available about COVID-19 cases and deaths? Who is reporting this information? How can people access this information?**

Ni taarifa zipi zinapatikana kuhusiana na wagonjwa na vifo vinavyotokana na UVIKO-19? Nani anatoa hizi taarifa? Watu wanapataje hizi taarifa?

- b. **What information would you like to receive from the government that you are not getting?**

- c. **To what extent is misinformation about COVID 19 a problem?**

Ni kwa kiasi gani taarifa zisizo sahihi kuhusu UVIKO-19 ni tatizo?

**d. Can you share any examples of misinformation, especially that related to the vaccine? [Probe to get at nature of misinformation as well as who is sharing it and through what channels.]**

**e. Are you aware of any efforts to combat misinformation?**

Unafahamu juhudi zozote za kukabiliana na taarifa zisizo sahihi kuhusu UVIKO-19?

**6. Do you collaborate with government offices or local officials to carry out your COVID-19 prevention activities?**

Unashirikianaje na maafisa wa serikali au wa halmashauri katika kutekeleza shughuli za kuzuia kuenea kwa UVIKO-19?

**7. Are you aware of anything that hinders local government officials and NGOs from doing the activities they would like to do to prevent coronavirus spread?**

Nini kinawazuia maafisa au watumishi wa serikali na katika Mashirika Yasiyo ya Kiserikali (NGOs) kutekeleza shughuli ambazo wangependa kuzitekeleza katika kuzuia kuenea kwa virusi vya Korona?

**a. Political factors-limitation from politicians and existing guidelines from doing coronavirus related activities?**

Sababu za kisiasa- vikwazo vya kisiasa na miongozo iliyopo ya kutekeleza shughuli zinazohusiana na kukabiliana na virusi vya Korona?

**b. Resource availability- how does it limit them from implementing coronavirus related activities?**

Uwepo wa rasilimali- ni kwa namna gani inazuia/ inakwamisha utekelezaji wa shughuli zinazohusiana na kupambana na virusi vya Korona?

**c. Social factors- how do customs/communities practices affect the response to coronavirus**

Sababu za kijamii- ni kwa namna gani desturi/taratibu za kijamii zinaadhiri kupambana na Virusi vya Korona?

**d. Economic factors- how do purchasing power of people affect their ability to implement coronavirus measures? Eg water supplies, masks etc**

Sababu za kiuchumi- ni kwa namna gani uwezo wa watu wa kununua unaadhiri uwezo wao wa kutekeleza mapambano dhidi ya Virusi vya Korona?

**8. To what extent is vaccination seen as a priority in Tanzania?**

Ni kwa kiasi gani chanjo inaonekana kama kipaumbele Tanzania?

**a. If it hasn't come up before: What are the main challenges to widespread vaccination?**

Ni changamoto kubwa zipi zilizopo katika kusambaza kwa wingi chanjo ya UVIKO-19?

## Interview Guide – Local Officials

**INTERVIEWER:** Please adhere to the following safety precautions when conducting interviews:

1. Please stand 2 meters away from the participant at all times.
2. Please wear a mask and encourage the participant to wear one if they have one.
3. Please do not touch the participant at any time.
4. If the participant coughs, please excuse yourself and ask to do the interview another time.
5. Immediately after the interview, please wash your hands with soap and water or hand sanitize your hands.

**Hello. I work for Mzumbe University under the direction of Professor Henry Mollel. We are collecting data to examine the changes in COVID-19 response in Tanzania since President Hassan took office. The purpose of these data is to contribute information on Tanzania to a research article on global policy responses to the pandemic. We are conducting original interviews with 20-30 purposively selected local officials from diverse geographic areas. We are interviewing local government officials at district, ward, and village level. During our interviews, we will ask questions about how the guidance you have received to contain COVID-19 has changed under President Hassan and how you have adapted, the factors that affect how you respond to the pandemic, and how community perceptions around COVID-19 have changed since President Hassan took office.**

**We are not affiliated with the government, and will not share your responses with government officials or police. These interviews will be confidential. In our report on the data, we will not include names or other information that could potentially identify you. We will not reveal the geographic location or position of the person when discussing individual responses to our questions.**

**This interview is completely voluntary, meaning you can stop the interview at any time. You can also refuse to answer any question.**

**Do you have any questions about the research or the interview guide?**

**I would like to audio record the interview so that I may capture all of the details of what you say. Do you give consent for me to audio record?**

1. **What is your role in government or service provision? What training did you receive for doing this role?**

Nini majukumu yenu kwa serikali au katika kutoa huduma? Ni mafunzo gani mmepokea katika kufanya majukumu hayo?

- 2. What official new guidance have you received since the new president Ms Samia Suluhu Hassan took office in combating the spread of coronavirus in Tanzania? Probe: testing/surveillance, mask wearing, isolating cases, vaccine**

Ni miongozo gani mmepata tangu raisi Samia Suluhu Hassan ameingia madarakani katika kukabiliana na kuenea kwa virusi vya Korona Tanzania?

- a. What are the differences between the guidance you received from President Samia Suluhu Hassan's government compared to the guidance you previously received from Magufuli's government? [Probe around issues of the legitimacy of this information.]**

Kuna tofauti gani kati ya muongozo wa sasa wakati wa Raisi Samia Suluhu Hassan na wakati wa raisi John Joseph Pombe Magufuli

- 3. Overall, how would you characterize Tanzania's response to COVID-19 under President Hassan? Is it significantly different from President Magufuli's?**

Kwa ujumla, unaonaje namna Tanzania inavyopambana na UVIKO-19 chini ya Raisi Samia Suluhu Hassan? Kuna tofauti kubwa ukilinganisha na wakati wa Raisi Magufuli?

- a. What do you think influences the government's decision-making? How are these influences different from under President Magufuli's government?**

- 4. What activities are you/your office engaged in related to combating the spread of coronavirus?**

*[If needed, prompt: public information campaigns; testing; enforcing regulations; contact tracing; etc.]*

Ni shughuli gani wewe ama ofisi yako inafanya katika kukabiliana na kuenea kwa virusi vya Korona?

*[Kama hajaeleza, ulizia: kampeni za taarifa kwa umma; upimaji; usimamizi wa sharia na taratibu; Ufuatiliaji wa waliokutana na waathirika; nk.]*

- a. What is your motivation for engaging in these activities to prevent the spread of coronavirus? Probe: have you lost loved ones to the coronavirus?**

Ni motisha gani inakusukuma kutekeleza shughuli za kuzuia kuenea kwa virusi vya Korona? *Dodosa: Kuna ndugu umewapoteza kutokana na janga hili la Korona?*

- b. Which of these activities is the most challenging to implement? What is the nature of the challenge? How was it challenging?**

Zipi kati ya shughuli hizi zimekuwa na changamoto kubwa kutekeleza? Nini chanzo ya changamoto hiyo? Ni kwa namna gani inakuwa changamoto?

**5. [If not already mentioned]** Are you engaging in activities related to the COVID-19 vaccine? (e.g., demand creation, distribution, overcoming vaccine hesitancy, etc.)

- a. To what extent is vaccination a priority for you and people in the community you serve?
- b. Where can people go to get the vaccine?
- c. What are the challenges you face in vaccinating people?
- d. How do people get information about COVID-19 and the vaccine? To what extent can people access reliable information?  
Kwa namna gani watu wanapata taarifa za UVIKO-19 na chanjo? Ni kwa kiasi gani watu wanaweza kupata taarifa sahihi?
- e. To the extent that they cannot access reliable information, what are the barriers? (probe: trust, politics) Please provide some examples.  
Ni kwa kiasi gani watu wanashindwa kupata taarifa sahihi na sababu ni zipi? (Dodosa: uaminifu, siasa) toa mifano.

**6. [For region officials]** Have districts in your region developed comprehensive council micro plans?

*[If no, have not developed a plan]*

- a. Are you aware that the central government has released guidelines that call for the development of such comprehensive micro plans? What do you think about the idea to create these plans?
- b. *[If aware but still haven't developed plan]* What has prevented your district from developing a plan?

*[If yes, have developed a plan]*

- a. Has your office provided technical support and backstopping to districts to help them with these plans?
- b. Are councils in your region implementing the plans? What challenges do you see in councils implementing the plans?
- c. Would it be possible to see copies of the plans? *[Data collector should ask for hard copy if possible or take picture with phone if not.]*

**[For district officials]** Has your district developed a comprehensive council micro plan?

*[If no, have not developed a plan]*

c. **Are you aware that the central government has released guidelines that call for the development of such comprehensive micro plans? What do you think about the idea to create these plans?**

d. ***[If aware but still haven't developed plan]* What has prevented your district from developing a plan?**

*[If yes, have developed a plan]*

a. **Can you tell me about the process to develop the plan? Who did the planning process involve and when was it carried out?**

b. **What are the main activities covered in the plan? Have you begun carrying them out?**

c. **Which of these activities has been the most effective, or *[if not yet implementing activities]* which do you think will be the most effective? What accounts for its effectiveness?**

d. **What are the barriers to implementing the micro plan? Which of these activities have been most challenging to implement, or *[if not yet implementing activities]* which do you think will be the most challenging? What is the nature of the challenge?**

e. **Would it be possible to see a copy of the plan? *[Data collector should ask for hard copy if possible or take picture with phone if not.]***

**7. How does the central government know about your activities of responding to Coronavirus? Do they monitor what you are doing to adhere to the guidelines?**

Serekale kuu kwa maana ya wizara ya Afya na TAMISEMI inafahamuje kuhusu majukumu unayofanya kukabiliana na virusi vya Korona? Wanakufatilia kuona kwamba unatekeleza shughuli zako za kukabiliana na virusi vya Korona kulingana na miongozo iliyopo?

**8. Are there any activities related to coronavirus containment/mitigation that you/your office are not engaged in but would like to be doing? Please elaborate with a few examples.**

Ni baadhi ya shughuli zipi zinazohusiana na kukabiliana na janga la Korona wewe ama ofisi yako haihusiki kuzifanya lakini nyie (ama ofisi yako) ingelipenda kuzifanya?

**9. *[For health facility governing committee members; other lower level officials]* What prevents you from doing the activities you would like to do to prevent coronavirus spread?**

Nini kinakukwamisha katika kutekeleza shughuli ambazo ungependa kuzifanya katika kukabiliana na kuenea kwa virusi vya Korona?

a. **Political factors-limitation from politicians and existing guidelines from doing coronavirus related activities?**



Sababu za kisiasa- kukwamishwa na wanasiasa na miongozo katika kutekeleza shughuli zinazohusiana na kuzuia kuenea kwa virusi vya Korona

**b. Resource availability- how do it limit you from implementing coronavirus related activities?**

Sababu za uwepo wa rasilimali- kushindwa kutekeleza shughuli kutokana na kukosekana kwa rasilimali au rasilimali kuwa kidogo?

**c. Social factors- how do customs/communities practices affect the response to coronavirus**

Sababu sa kijamii- mwitikio wa jamii kutokana na desturi zao?

**d. Economic factors- how do purchasing power of people affect their ability to implement coronavirus measures? Eg water supplies, masks etc**

Sababu sa kiuchumi- uwezo wa kununua mahitaji ya kujikinga na virusi vya Korona?

**10. Where do you get resources for containing coronavirus from? Probe: central government, donors, local revenues?**

Mnapata wapi rasilimali za kukabiliana na janga la Corona? Dodosa: Serikali kuu, wadau wa maendeleo, mapato ya halmashauri?

**e. How do you obtain these resources? Walk me through the process.**

Manapataje rasilimali hizo? Nieleze mchakato?

**f. What are the challenges you experience obtaining these resources?**

Ni changamoto zipi unakumbana nazo katika kupata rasilimali hizo?

**Thank you for your time and cooperation. We appreciate your taking time to talk with us.**

Tunashukuru kwa muda na ushirikiano wako. Asante sana kwa kutoa muda wako kuzungumza na sisi.
