# Supplementary material for: Confronting ‘chaos’: a qualitative study assessing public health officials’ perceptions of the factors affecting Tanzania’s COVID-19 vaccine rollout
Source: HighWire-hosted journal article supplement (doi:10.1136/bmjopen-2022-065081), 2023-01-01
Supplement: bmjopen-2022-065081supp002_data_supplement.pdf [file bmjopen-2022-065081supp002_data_supplement.pdf]

## Consolidated criteria for reporting qualitative studies (COREQ): 32-item checklist

Please indicate in which section each item has been reported in your manuscript. If you do not feel an item applies to your manuscript, please enter N/A.

For further information about the COREQ guidelines, please see Tong *et al.*, 2017:

<https://doi.org/10.1093/intqhc/mzm042>

| No.                                            | Item                                     | Description                                                                                                                                                     | Section #            |
|------------------------------------------------|------------------------------------------|-----------------------------------------------------------------------------------------------------------------------------------------------------------------|----------------------|
| <b>Domain 1: Research team and reflexivity</b> |                                          |                                                                                                                                                                 |                      |
| Personal characteristics                       |                                          |                                                                                                                                                                 | Pg 9, lines 14-15    |
| 1.                                             | Interviewer/facilitator                  | Which author/s conducted the interview or focus group?                                                                                                          | Pg 9, lines 14-15    |
| 2.                                             | Credentials                              | What were the researcher's credentials? <i>E.g. PhD, MD</i>                                                                                                     | Pg 9, lines 14-15    |
| 3.                                             | Occupation                               | What was their occupation at the time of the study?                                                                                                             | Pg 9, lines 14-15    |
| 4.                                             | Gender                                   | Was the researcher male or female?                                                                                                                              | Pg 9, lines 15-16    |
| 5.                                             | Experience and training                  | What experience or training did the researcher have?                                                                                                            |                      |
| Relationship with participants                 |                                          |                                                                                                                                                                 |                      |
| 6.                                             | Relationship established                 | Was a relationship established prior to study commencement?                                                                                                     | Pg 9, lines 16-17    |
| 7.                                             | Participant knowledge of the interviewer | What did the participants know about the researcher? <i>E.g. Personal goals, reasons for doing the research</i>                                                 | Pg 9, lines 17-18    |
| 8.                                             | Interviewer characteristics              | What characteristics were reported about the interviewer/facilitator? <i>E.g. Bias, assumptions, reasons and interests in the research topic</i>                | N/A                  |
| <b>Domain 2: Study design</b>                  |                                          |                                                                                                                                                                 |                      |
| Theoretical framework                          |                                          |                                                                                                                                                                 |                      |
| 9.                                             | Methodological orientation and theory    | What methodological orientation was stated to underpin the study? <i>E.g. grounded theory, discourse analysis, ethnography, phenomenology, content analysis</i> | Pg 10, lines 2-3     |
| Participant selection                          |                                          |                                                                                                                                                                 |                      |
| 10.                                            | Sampling                                 | How were participants selected? <i>E.g. purposive, convenience, consecutive, snowball</i>                                                                       |                      |
| 11.                                            | Method of approach                       | How were participants approached? <i>E.g. face-to-face, telephone, mail, email</i>                                                                              | Pg 8, lines 3-5      |
| 12.                                            | Sample size                              | How many participants were in the study?                                                                                                                        | Pg 9, line 5         |
| 13.                                            | Non-participation                        | How many people refused to participate or dropped out? What were the reasons for this?                                                                          | Pg 10, line 23-pg 11 |
| Setting                                        |                                          |                                                                                                                                                                 | N/A                  |
| 14.                                            | Setting of data collection               | Where was the data collected? <i>E.g. home, clinic, workplace</i>                                                                                               |                      |
| 15.                                            | Presence of non-participants             | Was anyone else present besides the participants and researchers?                                                                                               | Pg 9, lines 13-14    |

Pg 9, lines 13-14

Pg 7, line 23

|                                        |                                |                                                                                                                                          |                     |
|----------------------------------------|--------------------------------|------------------------------------------------------------------------------------------------------------------------------------------|---------------------|
| 16.                                    | Description of sample          | What are the important characteristics of the sample? <i>E.g. demographic data, date</i>                                                 | Pg 9, lines 2-5     |
| <b>Data collection</b>                 |                                |                                                                                                                                          |                     |
| 17.                                    | Interview guide                | Were questions, prompts, guides provided by the authors? Was it pilot tested?                                                            | No                  |
| 18.                                    | Repeat interviews              | Were repeat interviews carried out? If yes, how many?                                                                                    | Pg 9, line 21       |
| 19.                                    | Audio/visual recording         | Did the research use audio or visual recording to collect the data?                                                                      | Page 9, lines 22-23 |
| 20.                                    | Field notes                    | Were field notes made during and/or after the interview or focus group?                                                                  | Page 9, line 22     |
| 21.                                    | Duration                       | What was the duration of the interviews or focus group?                                                                                  | Pg 10, lines 20-21  |
| 22.                                    | Data saturation                | Was data saturation discussed?                                                                                                           | N/A                 |
| 23.                                    | Transcripts returned           | Were transcripts returned to participants for comment and/or correction?                                                                 |                     |
| <b>Domain 3: analysis and findings</b> |                                |                                                                                                                                          |                     |
| <b>Data analysis</b>                   |                                |                                                                                                                                          |                     |
| 24.                                    | Number of data coders          | How many data coders coded the data?                                                                                                     | Pg 10, lines 12-13  |
| 25.                                    | Description of the coding tree | Did authors provide a description of the coding tree?                                                                                    | Pg 10, lines 13-12  |
| 26.                                    | Derivation of themes           | Were themes identified in advance or derived from the data?                                                                              | Pg 10, lines 13-12  |
| 27.                                    | Software                       | What software, if applicable, was used to manage the data?                                                                               | Pg 10, line 13      |
| 28.                                    | Participant checking           | Did participants provide feedback on the findings?                                                                                       | N/A                 |
| <b>Reporting</b>                       |                                |                                                                                                                                          |                     |
| 29.                                    | Quotations presented           | Were participant quotations presented to illustrate the themes / findings? Was each quotation identified? <i>E.g. Participant number</i> | Pgs 11-18           |
| 30.                                    | Data and findings consistent   | Was there consistency between the data presented and the findings?                                                                       | Pgs 11-18           |
| 31.                                    | Clarity of major themes        | Were major themes clearly presented in the findings?                                                                                     | Pgs 11-18           |
| 32.                                    | Clarity of minor themes        | Is there a description of diverse cases or discussion of minor themes?                                                                   | Pg 15, line 15      |

**When submitting your manuscript via the online submission form, please upload the completed checklist as a Figure/supplementary file.**

**If you would like this checklist to be included alongside your article, we ask that you upload the completed checklist to an online repository and include the guideline type, name of the repository, DOI and license in the *Data availability* section of your manuscript.**

Developed from: Allison Tong, Peter Sainsbury, Jonathan Craig, Consolidated criteria for reporting qualitative research (COREQ): a 32-item checklist for interviews and focus groups, International Journal for Quality in Health Care, Volume 19, Issue 6, December 2007, Pages 349–357, <https://doi.org/10.1093/intqhc/mzm042>
