# Supplementary material for: Confronting ‘chaos’: a qualitative study assessing public health officials’ perceptions of the factors affecting Tanzania’s COVID-19 vaccine rollout
Source: HighWire-hosted journal article supplement (doi:10.1136/bmjopen-2022-065081), 2023-01-01
Supplement: bmjopen-2022-065081supp003_data_supplement.pdf [file bmjopen-2022-065081supp003_data_supplement.pdf]

## Reflexivity Statement

|                               | <b>Question</b>                                                                                                                                                                                                                                                                                               | <b>Responses</b>                                                                                                                                                                                                                                                                                                                                                                                                                                                                                                   |
|-------------------------------|---------------------------------------------------------------------------------------------------------------------------------------------------------------------------------------------------------------------------------------------------------------------------------------------------------------|--------------------------------------------------------------------------------------------------------------------------------------------------------------------------------------------------------------------------------------------------------------------------------------------------------------------------------------------------------------------------------------------------------------------------------------------------------------------------------------------------------------------|
| Study conceptualisation       | <ol style="list-style-type: none"> <li>1. How does this study address local research and policy priorities?</li> <li>2. How were local researchers involved in study design?</li> </ol>                                                                                                                       | <ol style="list-style-type: none"> <li>1. Tanzania has a national plan for COVID-19 vaccination, joined COVAX and is committed to inoculating their citizens against COVID-19.</li> <li>2. Local researchers helped to design the study, select the sample, and plan the interview guide.</li> </ol>                                                                                                                                                                                                               |
| Research management           | <ol style="list-style-type: none"> <li>1. How has funding been used to support the local research team(s)?</li> </ol>                                                                                                                                                                                         | <ol style="list-style-type: none"> <li>1. Yes, all Tanzanian research assistants were paid for their contributions to data collection and analysis.</li> </ol>                                                                                                                                                                                                                                                                                                                                                     |
| Data acquisition and analysis | <ol style="list-style-type: none"> <li>1. How are research staff who conducted data collection acknowledged?</li> <li>2. How have members of the research partnership been provided with access to study data?</li> <li>3. How were data used to develop analytical skills within the partnership?</li> </ol> | <ol style="list-style-type: none"> <li>1. We acknowledged one research assistant's (Nelson Kisanga) contributions to the results in the form of a co-authorship. The other research assistants were named in the Acknowledgments section.</li> <li>2. Yes, all members of the research team have access to all transcripts and the dataset in Dedoose.</li> <li>3. All Tanzanian research assistants were trained in using Dedoose software to code the data. This was a new analytical skill for them.</li> </ol> |
| Data interpretation           | <ol style="list-style-type: none"> <li>1. How have research partners collaborated in interpreting study data?</li> </ol>                                                                                                                                                                                      | <ol style="list-style-type: none"> <li>1. All members of the research team contributed to data interpretation and analysis. In addition, written results were shared</li> </ol>                                                                                                                                                                                                                                                                                                                                    |

## Reflexivity Statement

|                                                | Question                                                                                                                                                                                                                                                                                                                                                          | Responses                                                                                                                                                                                                                                                                                                                             |
|------------------------------------------------|-------------------------------------------------------------------------------------------------------------------------------------------------------------------------------------------------------------------------------------------------------------------------------------------------------------------------------------------------------------------|---------------------------------------------------------------------------------------------------------------------------------------------------------------------------------------------------------------------------------------------------------------------------------------------------------------------------------------|
|                                                |                                                                                                                                                                                                                                                                                                                                                                   | with the research team for feedback.                                                                                                                                                                                                                                                                                                  |
| Drafting and revising for intellectual content | <ol style="list-style-type: none"> <li>1. How were research partners supported to develop writing skills?</li> <li>2. How will research products be shared to address local needs?</li> </ol>                                                                                                                                                                     | <ol style="list-style-type: none"> <li>1. Research partners contributed to the writing of the manuscript.</li> <li>2. The manuscript will be shared with key stakeholders once published.</li> </ol>                                                                                                                                  |
| Authorship                                     | <ol style="list-style-type: none"> <li>1. How is the leadership, contribution and ownership of this work by LMIC researchers recognised within the authorship?</li> <li>2. How have early career researchers across the partnership been included within the authorship team?</li> <li>3. How has gender balance been addressed within the authorship?</li> </ol> | <ol style="list-style-type: none"> <li>1. The senior researcher from Tanzania, Henry Mollel, is recognized by being placed in the last authorship position.</li> <li>2. Nelson Kisanga is an early career researcher included in the authorship team.</li> <li>3. There are two men and four women in the authorship team.</li> </ol> |
| Training                                       | <ol style="list-style-type: none"> <li>1. How has the project contributed to training of LMIC researchers?</li> </ol>                                                                                                                                                                                                                                             | <ol style="list-style-type: none"> <li>1. Research assistants in Tanzania were trained over Zoom to code qualitative data in Dedoose.</li> </ol>                                                                                                                                                                                      |
| Infrastructure                                 | <ol style="list-style-type: none"> <li>1. How has the project contributed to improvements in local infrastructure?</li> </ol>                                                                                                                                                                                                                                     | <ol style="list-style-type: none"> <li>1. The project contributed by supporting the research assistants financially and by increasing their capacity to analyze research data. In our conclusion, we call for several improvements and investment in mass COVID-19 vaccination in Africa.</li> </ol>                                  |

## Reflexivity Statement

|            | <b>Question</b>                                                                                | <b>Responses</b>                                                                                                                   |
|------------|------------------------------------------------------------------------------------------------|------------------------------------------------------------------------------------------------------------------------------------|
| Governance | 1. What safeguarding procedures were used to protect local study participants and researchers? | 1. We obtained ethical approval from Mzumbe University and the President's Office of Regional Administration and Local Government. |
